# Supplementary material
Source: PubMed Central journal article supplement (PMC379317)
Supplement: jcinvest_113_7_1008__1.pdf [file jcinvest_113_7_1008__1.pdf]

**TABLE S1****Primers Used to Amplify and Sequence V<sub>L</sub> Genes**


---

| <b>Gene</b>         | <b>Sequence</b>                    | <b>mer</b> |
|---------------------|------------------------------------|------------|
| V <sub>κ</sub> I    | CAG C(GT)C CTG GG(GA) CT(CT) CTG   | 18         |
| V <sub>κ</sub> II   | TGG GGC TGC TAA TGC TCT G          | 19         |
| V <sub>κ</sub> III  | CCT CCT GCT ACT CTG GCT C          | 19         |
| V <sub>κ</sub> IV   | ATG GTG TTG CAG ACC CAG G          | 19         |
| V <sub>κ</sub> V    | ATG GGG TCC CAG GTT CAC C          | 19         |
| V <sub>κ</sub> VI   | TTC TGC T(GC)C TCT GGG TTC C       | 19         |
| C <sub>κ1</sub>     | CTG GGA TAG AAG TTA TTC AGC        | 21         |
| V <sub>λ</sub> Ia   | C(CT)C CTC TC(CT) TCC TCA C(CT)C T | 19         |
| V <sub>λ</sub> Ib   | (CT)CC CTC TCC TCC TCA CCC T       | 19         |
| V <sub>λ</sub> II   | ATG GCC TGG GCT CTG CT(CG)C        | 19         |
| V <sub>λ</sub> IIIa | ATG GC(AC) TGG A(TC)C CCT CTC T    | 19         |
| V <sub>λ</sub> IIIb | ATG GCC TGG A(CT)C (GC)CT CT(CA) C | 19         |
| V <sub>λ</sub> IIIc | ATG GCC TGG ACC GTT CTC C          | 19         |
| V <sub>λ</sub> IIId | ATG GCA TGG GCC ACA CTC C          | 19         |
| V <sub>λ</sub> IVa  | CCC TTC ATT TTC TCC ACA G          | 19         |
| V <sub>λ</sub> IVb  | CTC CTC CTC CAC CG(CG) ACA G       | 19         |
| V <sub>λ</sub> V    | ATG GCC TGG ACT CCT CT(CT) C       | 19         |
| V <sub>λ</sub> VI   | ATG GCC TGG GCT CCA CTA C          | 19         |
| V <sub>λ</sub> VII  | ATG GCC TGG ACT CCT CTC T          | 19         |
| V <sub>λ</sub> VIII | ATG GCC TGG ATG ATG CTT C          | 19         |
| V <sub>λ</sub> IX   | ATG GCC TGG GCT CCT CTG C          | 19         |
| V <sub>λ</sub> X    | ATG CCC TGG GCT CTG CTC C          | 19         |
| C <sub>λ1</sub>     | GCT GCT ATC TGC CTT CCA G          | 19         |
