# Supplementary material
Source: PubMed Central journal article supplement (PMC379317)
Supplement: jcinvest_113_7_1008__2.pdf [file jcinvest_113_7_1008__2.pdf]

**Table S2**  
**Characteristics of Isotype Switched B-CLL Cases Studied**

| <b>Non-IgM CLL No.</b> | <b>Gender</b> | <b>Isotype</b> | <b>V Gene Family</b> | <b>Most Homologous Germline V Gene</b> | <b>Percent V Gene Difference</b> | <b>Most Likely D segment</b> | <b>J Gene</b> | <b>CDR3 Length</b> | <b>GenBank Accession Number</b> |
|------------------------|---------------|----------------|----------------------|----------------------------------------|----------------------------------|------------------------------|---------------|--------------------|---------------------------------|
| 109                    | F             | γ2             | V <sub>H</sub> 1     | 1-18                                   | 7.7                              | 3-16                         | 4b            | 10                 | AF021944                        |
|                        |               |                | κI                   | A20                                    | 3.9                              |                              | Jκ4           | 9                  | AY043092                        |
| 158                    | M             | α              | V <sub>H</sub> 1     | 1-02                                   | 0.0                              | 2-2                          | 5b            | 17                 | AF021941                        |
|                        |               |                | κIII                 | L2                                     | 0.0                              |                              | Jκ2           | 10                 | AY043087                        |
| 030                    | M             | γ1             | V <sub>H</sub> 3     | H11                                    | 6.0                              | ?                            | 5b            | 12                 | X84334                          |
|                        |               |                | κI                   | L12a                                   | 6.4                              |                              | Jκ4           | 9                  | X84341                          |
| 040                    | F             | γ1             | V <sub>H</sub> 3     | 3-30                                   | 0.3                              | 2-15                         | 6c            | 13                 | X84337                          |
|                        |               |                | κI                   | L9                                     | 0.0                              |                              | Jκ1           | 10                 | X84344                          |
| 111                    | M             | γ1             | V <sub>H</sub> 3     | 3-07                                   | 6.1                              | ?                            | 6b            | 15                 | AF021945                        |
|                        |               |                | κI                   | A30                                    | 3.8                              |                              | Jκ3           | 11                 | AY043093                        |
| GN01                   | M             | γ1             | V <sub>H</sub> 3     | 3-53                                   | 7.0                              | ?                            | 4b            | 14                 | AJ389169                        |
|                        |               |                | κI                   | L12a                                   | 4.5                              |                              | Jκ1           | 9                  | AJ388640                        |
| 185                    | M             | γ              | V <sub>H</sub> 3     | 3-13                                   | 0.7                              | 5-12                         | 4b            | 15                 | AY268370                        |
|                        |               |                | κIII                 | L6                                     | 0.0                              |                              | Jκ4           | 10                 | AY043098                        |
| 089                    | M             | γ1             | V <sub>H</sub> 3     | 3-23                                   | 6.1                              | ?                            | 6a            | 18                 | AF021943                        |
|                        |               |                | λI                   | 1g                                     | 1.7                              |                              | Jλ2           | 11                 | AY043091                        |
| 005                    | M             | γ1             | V <sub>H</sub> 3     | 3-30                                   | 8.4                              | 2-8                          | 2             | 11                 | AF021964                        |
|                        |               |                | λII                  | 2b2                                    | 8.4                              |                              | Jλ2           | 12                 | AY043088                        |
| 078                    | F             | γ1             | V <sub>H</sub> 3     | 3-30                                   | 5.3                              | 3-22                         | 6c            | 17                 | AF021942                        |
|                        |               |                | λII                  | 2a2                                    | 4.4                              |                              | Jλ2           | 11                 | AY043090                        |
| GN15                   | M             | γ1             | V <sub>H</sub> 3     | 3-07                                   | 5.1                              | ?                            | 4b            | 7                  | AJ389182                        |
|                        |               |                | λII                  | 2c                                     | 4.1                              |                              | Jλ2           | 12                 | AJ388658                        |
| 075                    | F             | γ3             | V <sub>H</sub> 3     | 3-33                                   | 8.9                              | 3-9                          | 6b            | 20                 | AF021966                        |
|                        |               |                | λIII                 | 3l                                     | 8.0                              |                              | Jλ2           | 11                 | AY043089                        |
| 039*                   | F             | γ3             | V <sub>H</sub> 4     | 4-39                                   | 0.3                              | 6-13                         | 5b            | 16                 | X84336                          |
|                        |               |                | κI                   | O12/2                                  | 0.0                              |                              | Jκ2           | 9                  | X84343                          |
| 055                    | M             | γ1             | V <sub>H</sub> 4     | 4-34                                   | 9.0                              | ?                            | 5b            | 15                 | X84338                          |
|                        |               |                | κI                   | L19                                    | 6.3                              |                              | Jκ4           | 10                 | X84345                          |
| 057*                   | F             | γ3             | V <sub>H</sub> 4     | 4-39                                   | 0.7+                             | 6-13                         | 5b            | 17                 | X84339                          |
|                        |               |                | κI                   | O12/2                                  | 0.0                              |                              | Jκ1           | 9                  | X84346                          |
| 114*                   | M             | γ1             | V <sub>H</sub> 4     | 4-39                                   | 0.0+                             | 6-13                         | 5b            | 16                 | AY268372                        |
|                        |               |                | κI                   | O12/2                                  | 0.0                              |                              | Jκ1           | 9                  | AY043094                        |
| 132                    | M             | γ2             | V <sub>H</sub> 4     | 4-34                                   | 5.4                              | 5-24                         | 4b            | 12                 | AF021946                        |
|                        |               |                | κI                   | L12a                                   | 6.3                              |                              | Jκ4           | 9                  | AY043096                        |
| 202*                   | F             | γ3             | V <sub>H</sub> 4     | 4-39                                   | 0.7                              | 6-13                         | 5b            | 17                 | AY268373                        |
|                        |               |                | κI                   | O12/2                                  | 0.0                              |                              | Jκ1           | 9                  | AY043101                        |
| 209*                   | M             | NA             | V <sub>H</sub> 4     | 4-39                                   |                                  | 6-13                         | 5b            |                    | AY300037                        |
|                        |               |                | NA**                 | NA**                                   | NA**                             | NA**                         | NA**          | NA**               | NA**                            |
| 183                    | M             | γ2             | V <sub>H</sub> 4     | 4-34                                   | 3.1                              | 2-21                         | 6b            | 18                 | AF021948                        |
|                        |               |                | κII                  | A17                                    | 1.6                              |                              | Jκ2           | 10                 | AY043097                        |
| 033                    | M             | γ1             | V <sub>H</sub> 4     | 4-34                                   | 8.0                              | 2-15                         | 6b            | 22                 | X84335                          |
|                        |               |                | κIII                 | A27                                    | 4.8                              |                              | Jκ1           | 9                  | X84342                          |
| 128                    | M             | γ1             | V <sub>H</sub> 4     | 4-34                                   | 8.1                              | 4-11                         | 4b            | 12                 | AF021946                        |
|                        |               |                | κIII                 | A27                                    | 4.8                              |                              | Jκ3           | 11                 | AY043095                        |
| 186                    | F             | γ              | V <sub>H</sub> 4     | 4-34                                   | 4.8                              | [7-27, 2-8]                  | 6b            | 18                 | AY268371                        |
|                        |               |                | κIII                 | A27                                    | 3.5                              |                              | Jκ2           | 9                  | AY043099                        |
| 001                    | M             | γ1             | V <sub>H</sub> 4     | 4-34                                   | 5.0                              | 3-22                         | 6c            | 19                 | X84333                          |
|                        |               |                | λI                   | 1e                                     | 6.0                              |                              | Jλ2           | 11                 | X84340                          |
| 097                    | F             | α              | V <sub>H</sub> 7     | 7-04.1                                 | 0.0                              | 3-10                         | 4b            | 11                 | AF021940                        |
|                        |               |                | κI                   | O12/2                                  | 0.0                              |                              | Jκ2           | 10                 | AY043086                        |

\*: Denotes B-CLL cells expressing virtually identical BCRs  
 \*\*: Not available  
 +: Based on genomic (T cell) DNA sequence of patient's germline V<sub>H</sub> 4-39 gene
